# Supplementary material
Source: PubMed Central journal article supplement (PMC1851565)

**A.****a**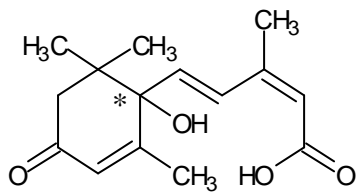**b**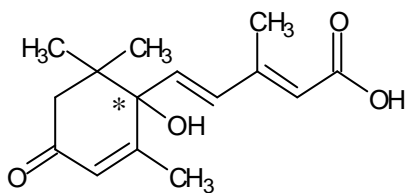**c**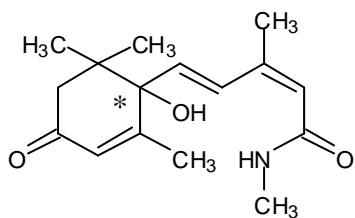**d**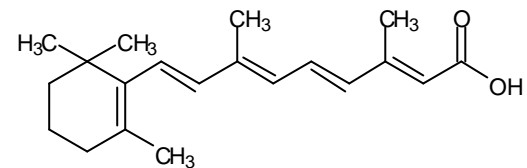**B.**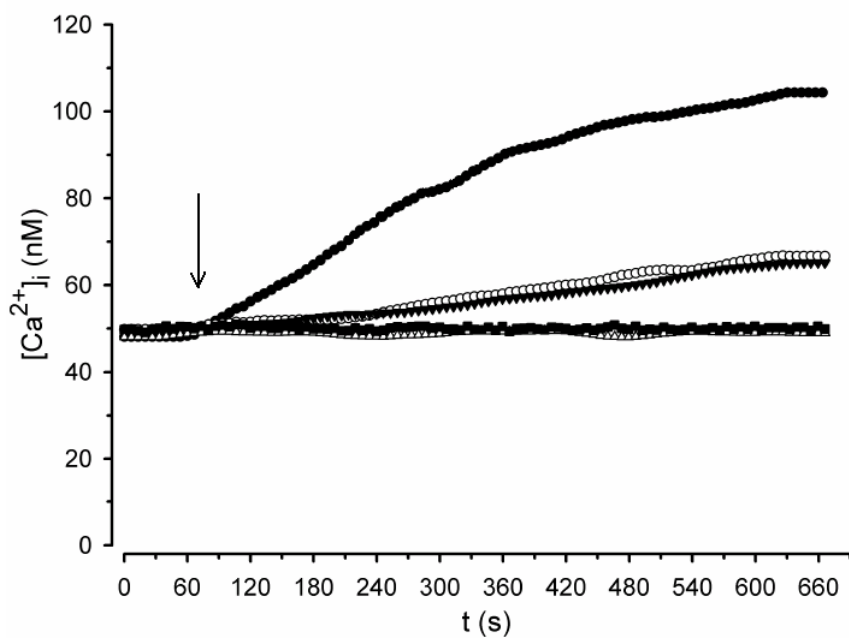**C.**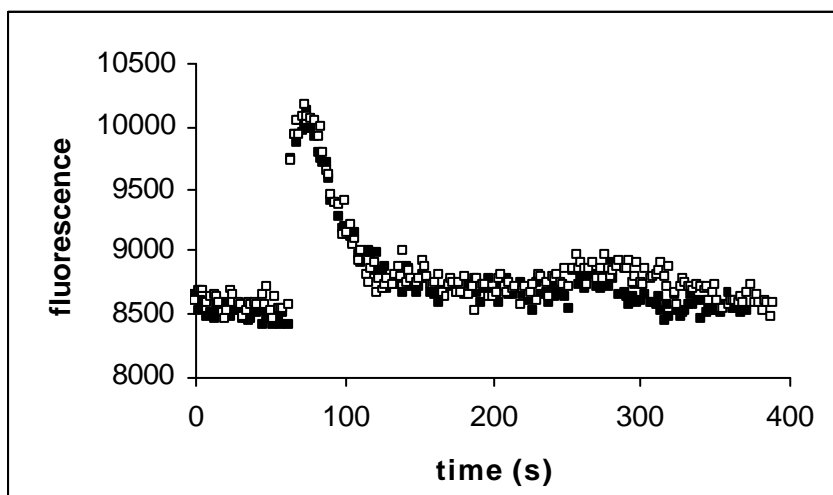

Supplement: pnas_0609379104_1.pdf [file pnas_0609379104_1.pdf]

**A**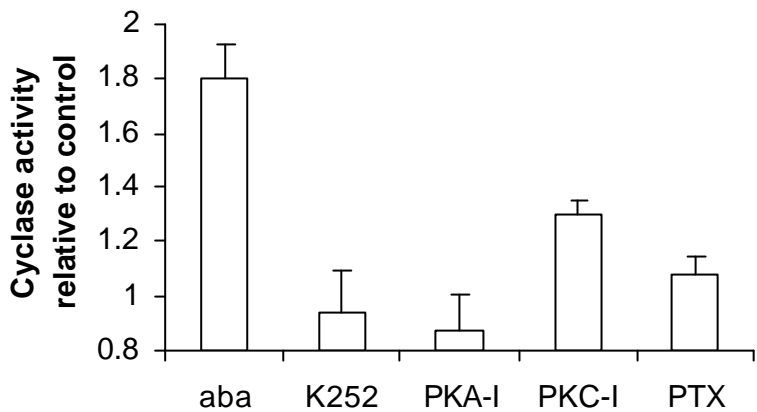**B**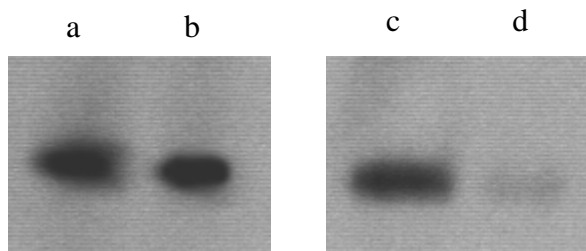

Supplement: pnas_0609379104_2.pdf [file pnas_0609379104_2.pdf]

SI Figure 7

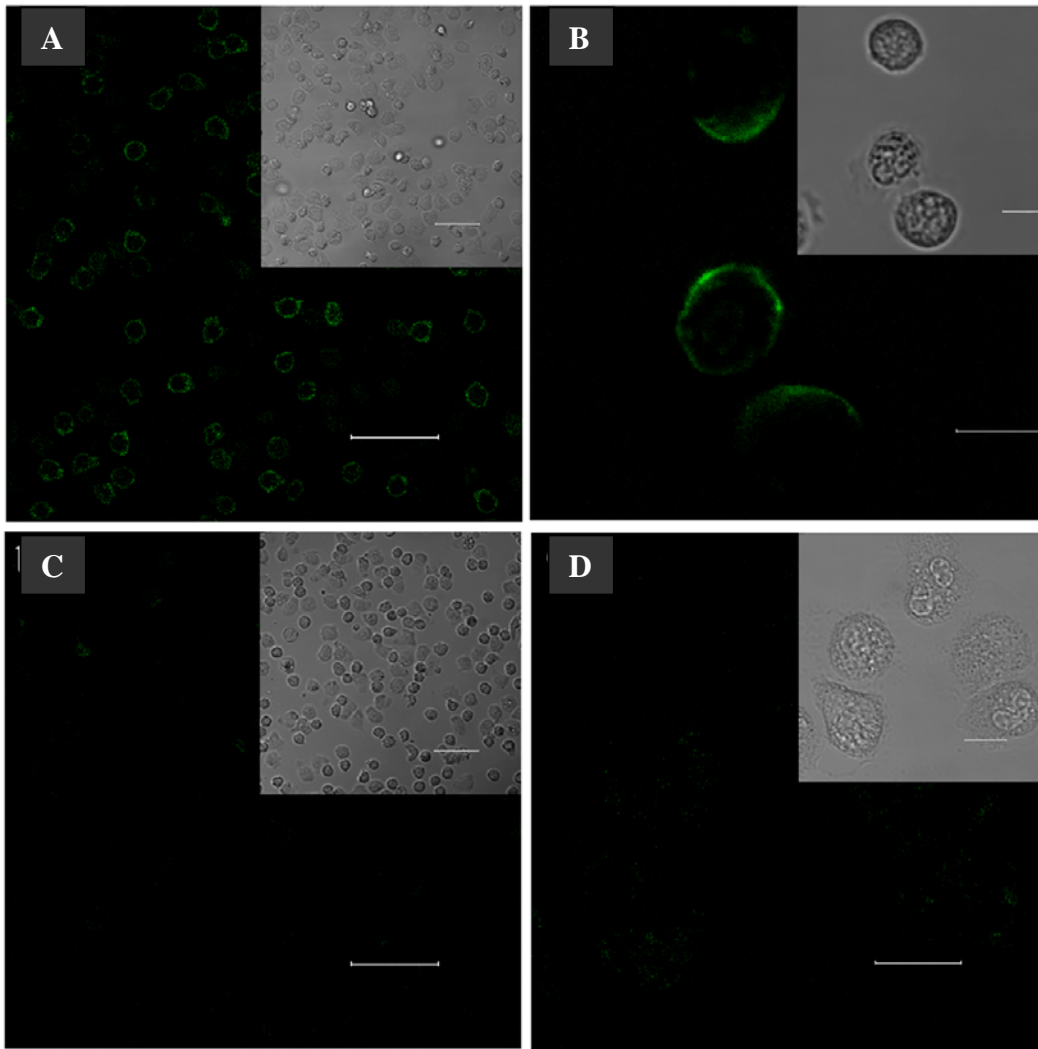

Supplement: pnas_0609379104_3.pdf [file pnas_0609379104_3.pdf]

**A**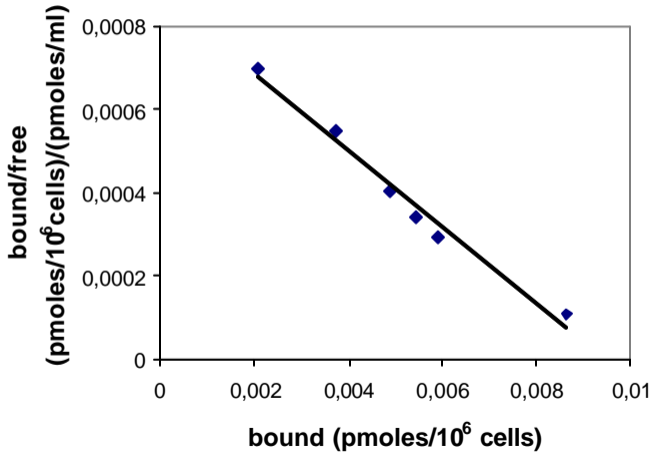**B**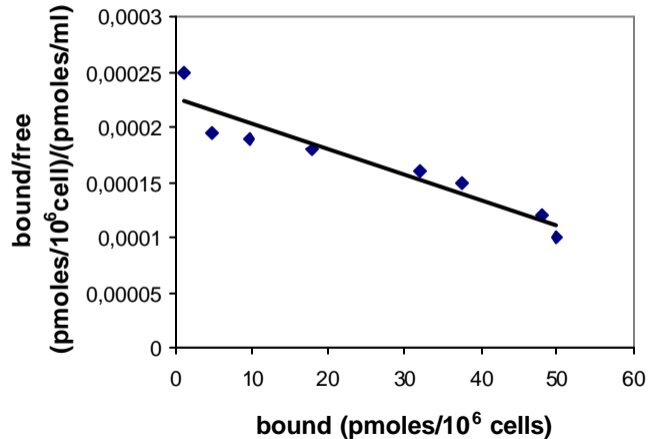

Supplement: pnas_0609379104_4.pdf [file pnas_0609379104_4.pdf]

**A**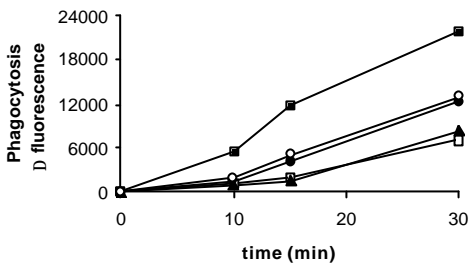**B**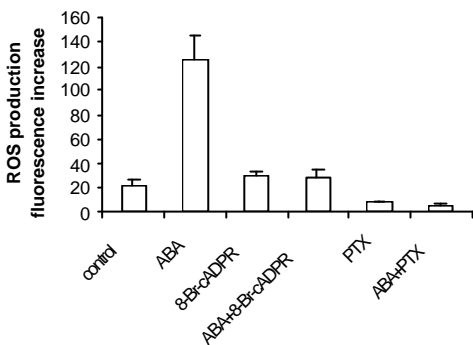**C**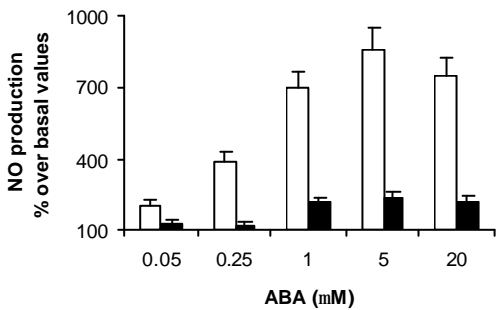**D**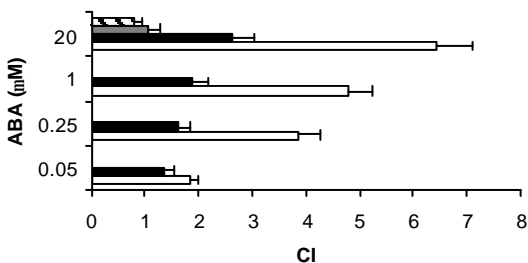

Supplement: pnas_0609379104_5.pdf [file pnas_0609379104_5.pdf]

SI Figure 10

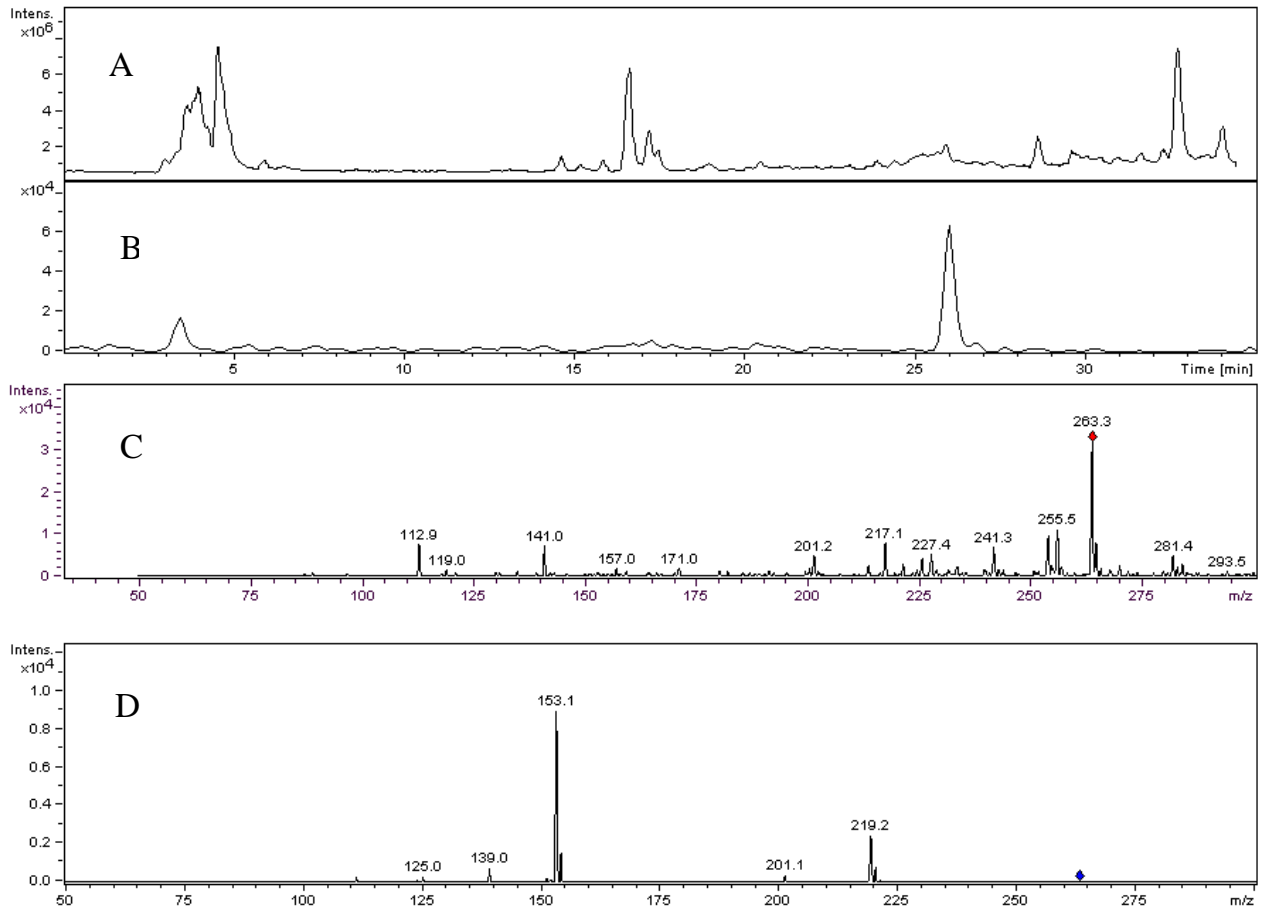

Supplement: pnas_0609379104_6.pdf [file pnas_0609379104_6.pdf]

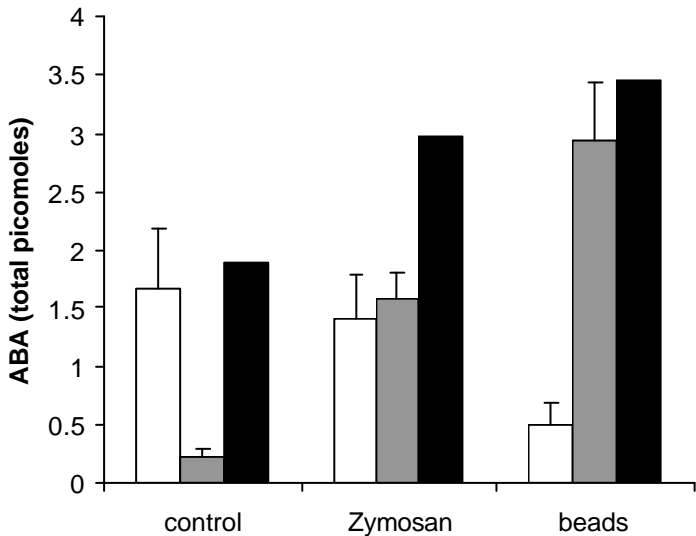

Supplement: pnas_0609379104_7.pdf [file pnas_0609379104_7.pdf]
